# Supplementary material for: Association of HDL cholesterol efflux capacity with incident coronary heart disease events: a prospective case-control study
Source: PubMed Central journal article supplement — Lancet Diabetes Endocrinol. 2015 Jul;3(7):507–13. doi: 10.1016/S2213-8587(15)00126-6 (PMC4648056; doi:10.1016/s2213-8587(15)00126-6), 2015-07

## Supplementary appendix

This appendix formed part of the original submission and has been peer reviewed. We post it as supplied by the authors.

Supplement to: Saleheen D, Scott R, Javad S, et al. Association of HDL cholesterol efflux capacity with incident coronary heart disease events: a prospective case-control study. *Lancet Diabetes Endocrinol* 2015; published online May 27. [http://dx.doi.org/10.1016/S2213-8587\(15\)00126-6](http://dx.doi.org/10.1016/S2213-8587(15)00126-6).

**eTable 1.** Cross-sectional correlates of cholesterol efflux capacity in control participants only (n=1749)

|                                                        | <b>Cholesterol Efflux<br/>(r [95% CI])</b> | <b>P-value</b> |
|--------------------------------------------------------|--------------------------------------------|----------------|
| <b><i>Demographic &amp; anthropometric markers</i></b> |                                            |                |
| Age (years)                                            | 0.06 (0.01, 0.09)                          | 0.01           |
| Female                                                 | 0.24 (0.2, 0.27)                           | 0.001          |
| Waist to hip ratio                                     | -0.08 (-0.11, -0.04)                       | <0.0001        |
| BMI                                                    | -0.06 (-0.09, -0.01)                       | 0.008          |
| <b>Medical history, tobacco use and blood pressure</b> |                                            |                |
| History of diabetes                                    | -0.18 (-0.21, -0.14)                       | <0.0001        |
| History of hypertension                                | -0.03 (-0.07, 0.01)                        | 0.14           |
| Systolic blood pressure (mmHg)                         | 0.02 (-0.02, 0.06)                         | 0.40           |
| Diastolic blood pressure (mmHg)                        | 0.02 (-0.01, 0.06)                         | 0.33           |
| Cigarette use                                          | 0 (-0.04, 0.03)                            | 0.85           |
| Amount of alcohol consumed                             | 0.12 (0.08, 0.15)                          | <0.0001        |
| Statin use                                             | 0 (-0.04, 0.04)                            | 0.85           |
| <b><i>Lipid-related markers</i></b>                    |                                            |                |
| Log-Triglycerides (mmol/l)                             | -0.02 (-0.05, 0.02)                        | 0.39           |
| Total cholesterol (mmol/l)                             | 0.18 (0.15, 0.22)                          | <0.0001        |
| LDL-C (mmol/l)                                         | 0.05 (0.02, 0.09)                          | 0.002          |
| Apo-B (mmol/l)                                         | 0.03 (0, 0.08)                             | 0.09           |
| HDL-C (mmol/l)                                         | 0.40 (0.38, 0.42)                          | <0.0001        |
| ApoA-I (mmol/l)                                        | 0.22 (0.18, 0.26)                          | <0.0001        |

Partial correlation coefficients adjusted for age and sex were calculated to assess correlations between cholesterol efflux capacity and other traits.

**eFigure1.** Association of cholesterol efflux capacity progressively adjusted for a number of traits and HDL-C levels

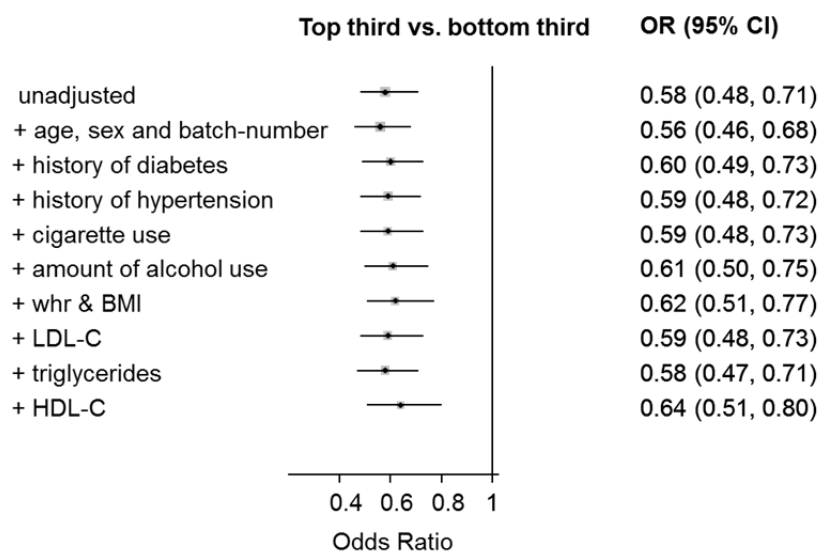

**eTable 2.** Association of cholesterol efflux capacity with incident CHD events progressively adjusted for vascular risk factors and apoA-I levels.

| Model                               | OR (95% CI)                                      |                                                  |                                               | OR (95% CI)            |
|-------------------------------------|--------------------------------------------------|--------------------------------------------------|-----------------------------------------------|------------------------|
|                                     | <i>Bottom Tertile</i><br>(Mean CEC: 0.83 ± 0.09) | <i>Middle Tertile</i><br>(Mean CEC: 1.13 ± 0.09) | <i>Top Tertile</i><br>(Mean CEC: 1.40 ± 0.09) | <i>Per-SD increase</i> |
| No adjustments <sup>#</sup>         | 1.00 (0.83,1.21)                                 | 0.74 (0.62,0.88)                                 | 0.47 (0.37,0.61)**                            | 0.62 (0.49-0.76)       |
| plus age, sex and batch-number      | 1.00 (0.82,1.21)                                 | 0.76 (0.63,0.91)                                 | 0.44 (0.34,0.57)**                            | 0.68 (0.54-0.83)       |
| plus history of diabetes            | 1.00 (0.82,1.22)                                 | 0.80 (0.67,0.97)                                 | 0.49 (0.37,0.64)**                            | 0.68 (0.54-0.83)       |
| plus history of hypertension status | 1.00 (0.81,1.23)                                 | 0.78 (0.65,0.94)                                 | 0.49 (0.37,0.64)**                            | 0.66 (0.51-0.81)       |
| plus cigarette use                  | 1.00 (0.81,1.23)                                 | 0.79 (0.65,0.96)                                 | 0.49 (0.37,0.64)**                            | 0.70 (0.54-0.86)       |
| plus alcohol use                    | 1.00 (0.81,1.23)                                 | 0.81 (0.67,0.98)                                 | 0.51 (0.39,0.67)**                            | 0.70 (0.54-0.86)       |
| plus waist-to-hip ratio & BMI       | 1.00 (0.81,1.23)                                 | 0.81 (0.67,0.99)                                 | 0.51 (0.39,0.68)**                            | 0.71 (0.54-0.88)       |
| plus LDL-C                          | 1.00 (0.81,1.24)                                 | 0.80 (0.66,0.97)                                 | 0.49 (0.37,0.64)**                            | 0.73 (0.56-0.91)       |
| plus log-triglycerides              | 1.00 (0.81,1.24)                                 | 0.80 (0.66,0.96)                                 | 0.48 (0.36,0.64)**                            | 0.75 (0.57-0.93)       |
| plus apoA-I levels                  | 1.00 (0.80,1.25)                                 | 0.80 (0.67,0.97)                                 | 0.50 (0.38,0.67)**                            | 0.72 (0.51-0.93)       |

\*\*P-value from trend-test < 0.0001; Analyses were conducted in 1428 cases and 1749 controls on whom apoA-I levels were available.

Odds ratios (ORs) for CHD were calculated using unconditional logistic regression analyses and effect estimates were progressively adjusted for age, sex, batch-number, history of diabetes, history of hypertension, cigarette use, amount of alcohol intake, body-mass index (BMI), waist-to-hip ratio (WHR), LDL-C, log-triglycerides and apoA-1 levels. The total number of participants remained the same for all the models. ORs were calculated using tertiles of cholesterol efflux capacity; the corresponding 95% CIs were estimated from floating absolute variances that reflect the amount of information underlying each group (including the reference group) (19). Data on apoA-I levels were available in 1428 cases and 1749 controls.

**eFigure 2.** Association of cholesterol efflux capacity with incident CHD events progressively adjusted for cardiovascular risk factors and apoA-I levels.

**eFigure 1a**

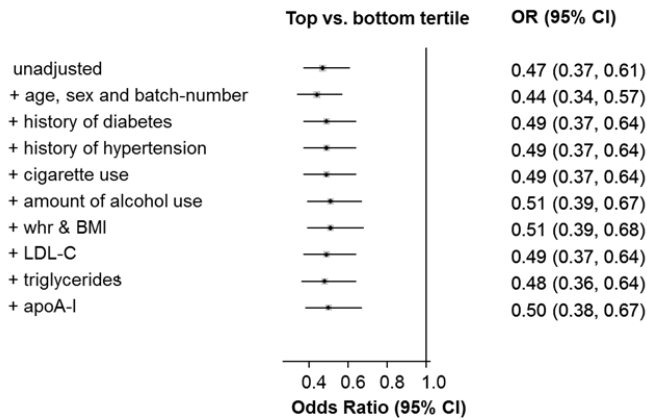

**eFigure 1b**

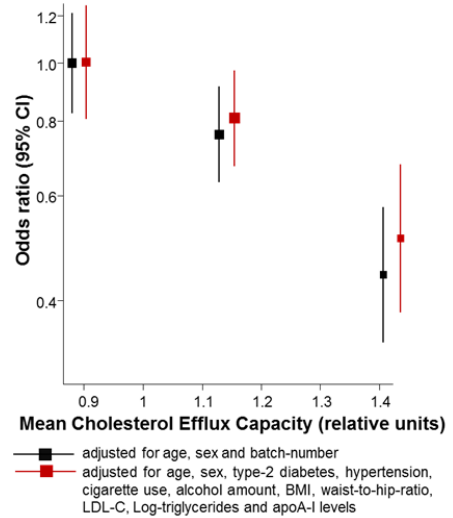

eFigure 1a. Odds ratios (ORs) for CHD were calculated using unconditional logistic regression analyses. Effect estimates and corresponding 95% CIs are shown only for the participants in the top-tertile of the distribution for cholesterol efflux capacity. Effect estimates were progressively adjusted for age, sex, batch-number, history of diabetes, history of hypertension, cigarette use, amount of alcohol intake, body-mass index (BMI), waist-to-hip ratio (WHR), LDL-C, logtriglyceride levels and apoA-I.

eFigure 1b. Shapes of the association for cholesterol efflux capacity with incident CHD risk are shown using tertiles of cholesterol efflux capacity. Analyses are only shown for two models: (i) analyses adjusted for age, sex and batch-number only; and (ii) analyses adjusted for age, sex, history of diabetes, history of hypertension, cigarette use, amount of alcohol intake, body-mass index (BMI), waist-to-hip ratio (WHR), LDL-C, log-triglyceride levels and apoA-I. The number of participants remain the same in the two models.

**eFigure 3.** Fractional polynomial analyses to assess shape of the association of CEC with incident CHD risk.

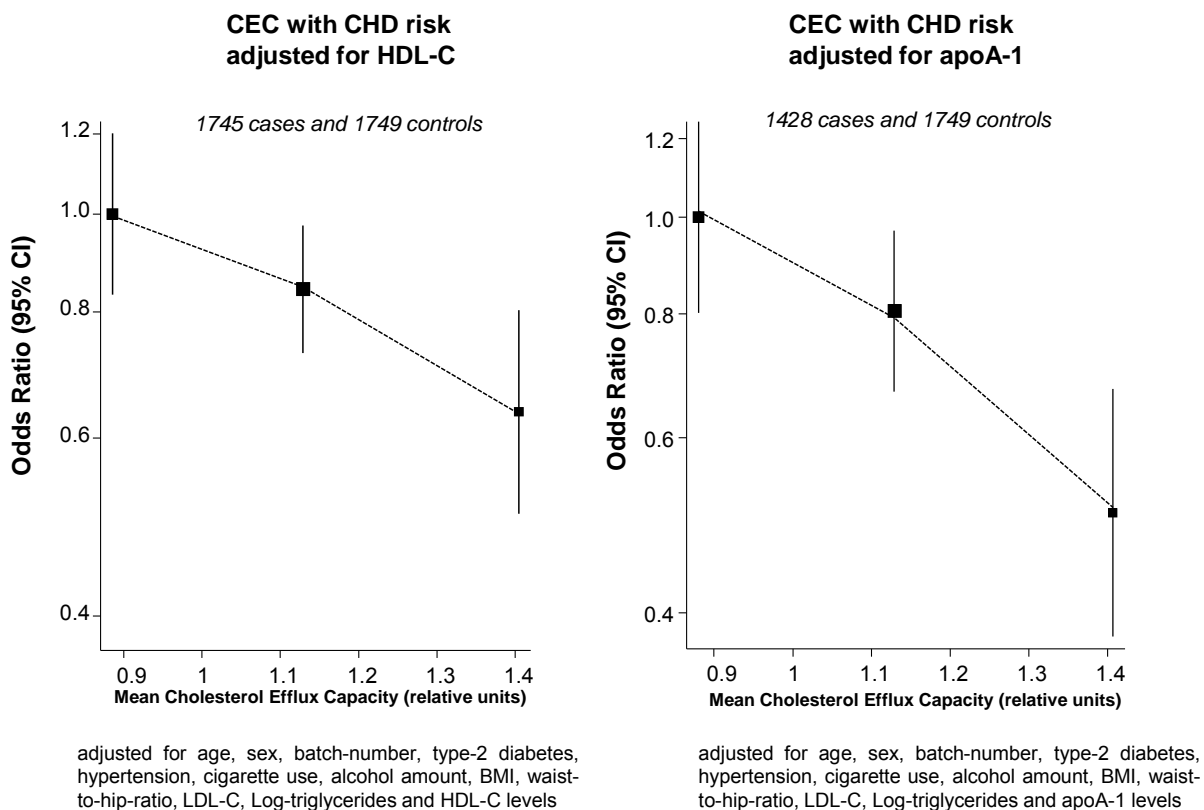

**eFigure 4.** Analyses of efflux capacity with incident CHD risk by subgroups of selected cardiovascular risk factors

**Top versus Bottom third of efflux capacity**

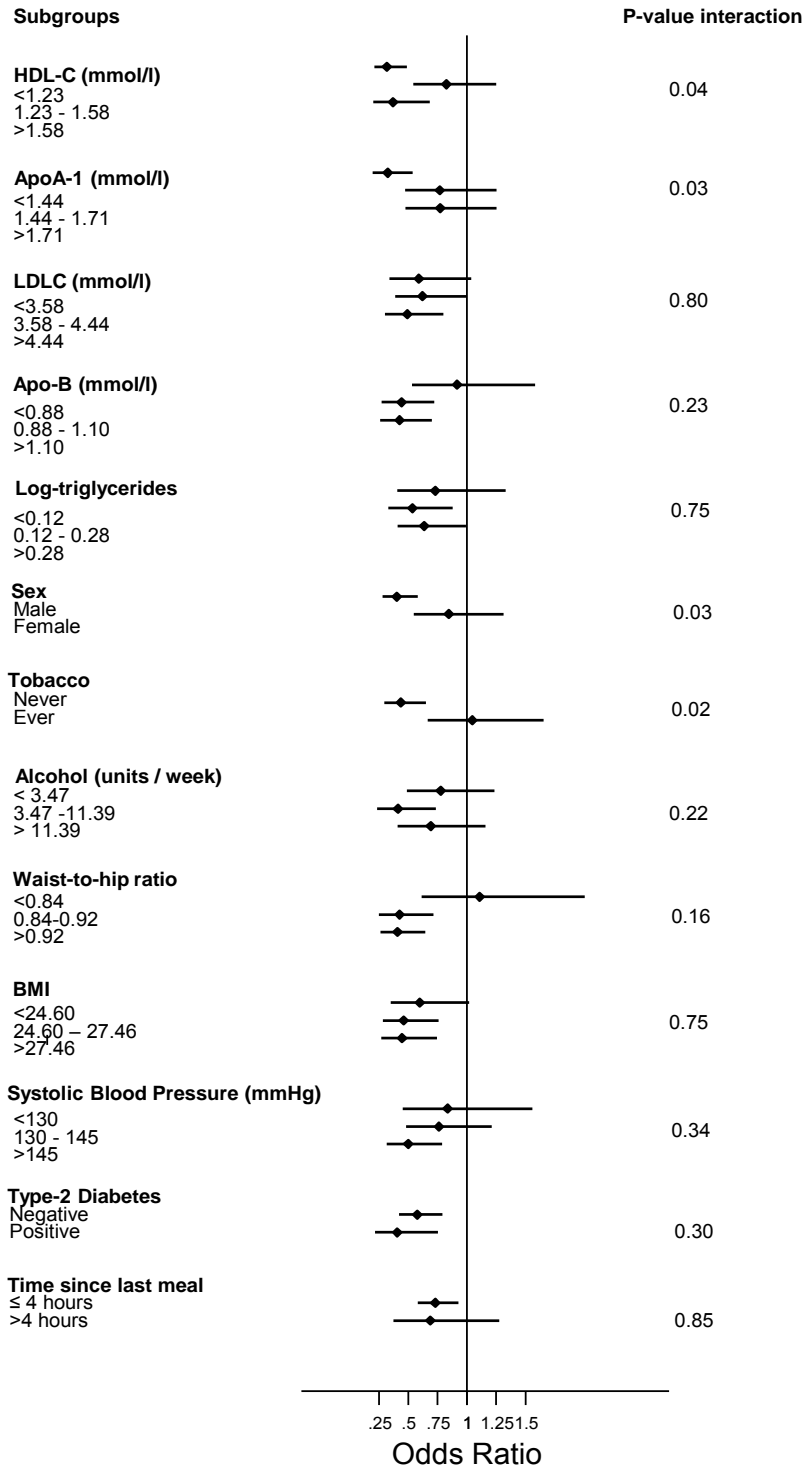

Supplement: mmc1.pdf [file mmc1.pdf]
